# Supplementary material for: Effect of a single warm compress prior to ophthalmic surgery on ocular surface and intraoperative visibility: a randomised controlled study
Source: HighWire-hosted journal article supplement (doi:10.1136/bmjophth-2023-001307), 2023-07-01
Supplement: bmjophth-2023-001307supp001_data_supplement.pdf [file bmjophth-2023-001307supp001_data_supplement.pdf]

# Supplemental table

## Profile of pretreatment without glaucoma patients

|                             | HM group(n=86) | Control group(n=88) | P value |
|-----------------------------|----------------|---------------------|---------|
| Age(years-old)              | 69.2 ± 13.7    | 69.3 ± 16.3         | 0.99*   |
| Sex(female/male)            | 37/49          | 40/48               | 0.74 †  |
| NIBUT first(sec)            | 7.06 ± 5.19    | 6.78 ± 5.00         | 0.71*   |
| NIBUT average(sec)          | 9.80 ± 5.65    | 9.69 ± 5.13         | 0.89*   |
| Meiboscore                  | 0.65 ± 0.79    | 0.45 ± 0.78         | 0.01 ‡  |
| Tear meniscus height(mm)    | 0.22 ± 0.08    | 0.22 ± 0.07         | 0.36*   |
| Conjunctive hyperemia score | 1.17 ± 0.58    | 1.33 ± 0.72         | 0.05 ‡  |

HM: heating eye mask

NIBUT: noninvasive breakup of tear film

Meiboscore: obstruction score of the meibomian gland

\*unpaired-t test

† chi-square test

‡ Mann-Whitney U Test

# Supplemental table

## Result of post treatment without glaucoma patients

|                      | HM group(n=86) |             |             | Control group(n=88) |             |             |
|----------------------|----------------|-------------|-------------|---------------------|-------------|-------------|
|                      | pre            | post        | Pre vs post | pre                 | Post        | Pre vs post |
| NIBUT(first)         | 7.06 ± 5.19    | 9.44 ± 5.77 | <0.001*     | 6.78 ± 5.00         | 6.51 ± 4.82 | 0.41*       |
| NIBUT(average)       | 9.80 ± 5.65    | 12.2 ± 5.29 | <0.001*     | 9.69 ± 5.13         | 9.60 ± 9.08 | 0.62*       |
| Meiboscore           | 0.65 ± 0.79    | 0.53 ± 0.71 | 0.01 †      | 0.45 ± 0.78         | 0.45 ± 0.78 | 0.27 †      |
| Tear meniscus height | 0.22 ± 0.08    | 0.25 ± 0.08 | <0.001*     | 0.23 ± 0.07         | 0.22 ± 0.07 | 0.16*       |
| Hyperemia score      | 1.17 ± 0.58    | 1.36 ± 0.59 | <0.001 †    | 1.33 ± 0.72         | 1.29 ± 0.70 | 0.002 †     |

HM: heating eye mask

NIBUT: noninvasive breakup of tearfilm

Meiboscore: obstruction score of the meibomian gland

\* Welch's t test

† Wilcoxon signed rank test
